# Supplementary material for: Semantics about soil organic carbon storage: DATA4C+, a comprehensive thesaurus and classification of management practices in agriculture and forestry
Source: Copernicus journal article supplement (doi:10.5194/egusphere-2022-115), 2022-05-23
Supplement: Supplementary file 1 [file egusphere-2022-115-supplement.pdf]

| Land use                                                             | Reference                                                                                                                                                                                                                                                                                                                                                                                                                                                                                                                                                                              |
|----------------------------------------------------------------------|----------------------------------------------------------------------------------------------------------------------------------------------------------------------------------------------------------------------------------------------------------------------------------------------------------------------------------------------------------------------------------------------------------------------------------------------------------------------------------------------------------------------------------------------------------------------------------------|
| Annual and perennial croplands                                       | Bai, X., Huang, Y., Ren, W., Coyne, M., Jacinthe, P.-A., Tao, B., Hui, D., Yang, J., Matocha, C., 2019. Responses of soil carbon sequestration to climate-smart agriculture practices: A meta-analysis. <i>Glob. Change Biol.</i> 25, 2591–2606. <a href="https://doi.org/10.1111/gcb.14658">https://doi.org/10.1111/gcb.14658</a>                                                                                                                                                                                                                                                     |
| Grasslands                                                           | Batjes, N.H., 2019. Technologically achievable soil organic carbon sequestration in world croplands and grasslands. <i>Land Degradation &amp; Development</i> 30, 25–32. <a href="https://doi.org/10.1002/ldr.3209">https://doi.org/10.1002/ldr.3209</a>                                                                                                                                                                                                                                                                                                                               |
| Annual and perennial croplands, Grasslands                           | Cardinael, R., Umulisa, V., Toudert, A., Olivier, A., Bockel, L., Bernoux, M., 2018. Revisiting IPCC Tier 1 coefficients for soil organic and biomass carbon storage in agroforestry systems. <i>Environ. Res. Lett.</i> 13, 124020. <a href="https://doi.org/10.1088/1748-9326/aaeb5f">https://doi.org/10.1088/1748-9326/aaeb5f</a>                                                                                                                                                                                                                                                   |
| Annual and perennial croplands, Grasslands                           | Chambers, A., Lal, R., Paustian, K., 2016. Soil carbon sequestration potential of US croplands and grasslands: Implementing the 4 per Thousand Initiative. <i>Journal of Soil and Water Conservation</i> 71, 68A-74A. <a href="https://doi.org/10.2489/jswc.71.3.68A">https://doi.org/10.2489/jswc.71.3.68A</a>                                                                                                                                                                                                                                                                        |
| Forests, Annual and perennial croplands, Grasslands                  | Chenu, C., Angers, D.A., Barré, P., Derrien, D., Arrouays, D., Balesdent, J., 2019. Increasing organic stocks in agricultural soils: Knowledge gaps and potential innovations. <i>Soil Tillage Res., Soil Carbon and Climate Change: the 4 per Mille Initiative</i> 188, 41–52. <a href="https://doi.org/10.1016/j.still.2018.04.011">https://doi.org/10.1016/j.still.2018.04.011</a>                                                                                                                                                                                                  |
| Annual and perennial croplands, Grasslands, Land use change          | Chotte, J.L., Aynekulu, E., Cowie, A., Campbell, E., Viek, P., Lal, R., Kapovic-Solomon, M., Von Matitz, G.P., Kust, G., Barger, N., 2019. Realising the Carbon Benefits of Sustainable Land Management Practices: Guidelines for estimation of soil organic carbon in the context of land degradation neutrality planning and monitoring. A report of the Science-Policy Interface, United Nations Convention to Combat Desertification (UNCCD), Bonn, Germany.                                                                                                                       |
| Grasslands, Land use change                                          | Conant, R.T., Cerri, C.E.P., Osborne, B.B., Paustian, K., 2017. Grassland management impacts on soil carbon stocks: a new synthesis. <i>Ecol. Appl.</i> 27, 662–668. <a href="https://doi.org/10.1002/eap.1473">https://doi.org/10.1002/eap.1473</a>                                                                                                                                                                                                                                                                                                                                   |
| Annual and perennial croplands, Grasslands                           | Corbeels, M., Cardinael, R., Naudin, K., Guibert, H., Torquebiau, E., 2019. The 4 per 1000 goal and soil carbon storage under agroforestry and conservation agriculture systems in sub-Saharan Africa. <i>Soil Tillage Res., Soil Carbon and Climate Change: the 4 per Mille Initiative</i> 188, 16–26. <a href="https://doi.org/10.1016/j.still.2018.02.015">https://doi.org/10.1016/j.still.2018.02.015</a>                                                                                                                                                                          |
| Annual and perennial croplands, Grasslands                           | Davidson, E.A., De Abreu Sá, T.D., Reis Carvalho, C.J., De Oliveira Figueiredo, R., Kato, M.S.A., Kato, O.R., Ishida, F.Y., 2008. An integrated greenhouse gas assessment of an alternative to slash-and-burn agriculture in eastern Amazonia. <i>Global Change Biology</i> 14, 998–1007.                                                                                                                                                                                                                                                                                              |
| Annual and perennial croplands, Grasslands                           | Emde, D., Hamman, K.D., Most, I., Nelson, L.M., Jones, M.D., 2021. Soil organic carbon in irrigated agricultural systems: A meta-analysis. <i>Global Change Biology</i> 27, 3898–3910. <a href="https://doi.org/10.1111/gcb.15680">https://doi.org/10.1111/gcb.15680</a>                                                                                                                                                                                                                                                                                                               |
| Annual and perennial croplands                                       | Fujiisaki, K., Chevallier, T., Chapuis-Lardy, L., Albrecht, A., Razafimbelo, T., Masse, D., Ndour, Y.B., Chotte, J.-L., 2018. Soil carbon stock changes in tropical croplands are mainly driven by carbon inputs: A synthesis. <i>Agriculture, Ecosystems &amp; Environment</i> 259, 147–158. <a href="https://doi.org/10.1016/j.agee.2017.12.008">https://doi.org/10.1016/j.agee.2017.12.008</a>                                                                                                                                                                                      |
| Forests, Annual and perennial croplands, Grasslands, Land use change | Griscom, B.W., Adams, J., Ellis, P.W., Houghton, R.A., Lomax, G., Miteva, D.A., Schlesinger, W.H., Shoch, D., Sikamaki, J.V., Smith, P., 2017. Natural climate solutions. <i>Proceedings of the National Academy of Sciences</i> 114, 11645–11650.                                                                                                                                                                                                                                                                                                                                     |
| Annual and perennial croplands, Grasslands                           | Grover, S.P., Butterly, C.R., Wang, X., Gleeson, D.B., Macdonald, L.M., Hall, D., Tang, C., 2020. An agricultural practise with climate and food security benefits: "Claying" with kaolinitic clay subsoil decreased soil carbon priming and mineralisation in sandy cropping soils. <i>Science of The Total Environment</i> 709, 134488.                                                                                                                                                                                                                                              |
| Annual and perennial croplands                                       | Li, Y., Shi, S., Waqas, M.A., Zhou, X., Li, J., Wan, Y., Qin, X., Gao, Q., Liu, S., Wilkes, A., 2018. Long-term (≥20 years) application of fertilisers and straw return enhances soil carbon storage: a meta-analysis. <i>Mitigation and adaptation strategies for global change</i> 23, 603–619.                                                                                                                                                                                                                                                                                      |
| Annual and perennial croplands                                       | Maillard, E., Angers, D.A., 2014. Animal manure application and soil organic carbon stocks: a meta-analysis. <i>Global Change Biology</i> 20, 666–679.                                                                                                                                                                                                                                                                                                                                                                                                                                 |
| Forests                                                              | Mayer, M., Prescott, C.E., Abaker, W.E.A., Augusto, L., Cécillon, L., Ferreira, G.W.D., James, J., Jandl, R., Katzensteiner, K., Laclau, J.-P., Laganière, J., Paré, D., Stanturf, J.A., Vanguelova, E.I., Vesterdal, L., 2020. Tamm Review: influence of forest management activities on soil organic carbon stocks: A knowledge synthesis. <i>For. Ecol. Manag.</i> 466, 118127. <a href="https://doi.org/10.1016/j.foreco.2020.118127">https://doi.org/10.1016/j.foreco.2020.118127</a>                                                                                             |
| Forests, Annual and perennial croplands, Grasslands                  | Paradelo, R., Virto, I., Chenu, C., 2015. Net effect of liming on soil organic carbon stocks: A review. <i>Agriculture, Ecosystems &amp; Environment</i> 202, 98–107.                                                                                                                                                                                                                                                                                                                                                                                                                  |
| Annual and perennial croplands, Grasslands                           | Paustian, K., Lehmann, J., Ogle, S., Reay, D., Robertson, G.P., Smith, P., 2016. Climate-smart soils. <i>Nature</i> 532, 49–57. <a href="https://doi.org/10.1038/nature17174">https://doi.org/10.1038/nature17174</a>                                                                                                                                                                                                                                                                                                                                                                  |
| Annual and perennial croplands, Grasslands                           | Pellerin, S., Bamière, L., Launay, C., Martin, R., Schiavon, M., Angers, D., Augusto, L., Balesdent, J., Basile-Doelsch, I., Bellassen, V., 2020. Stocker du carbone dans les sols français. Quel potentiel au regard de l'objectif 4 pour 1000 et à quel coût? (Rapport scientifique de l'étude). INRA (France).                                                                                                                                                                                                                                                                      |
| Annual and perennial croplands                                       | Poepplau, C., Don, A., 2015. Carbon sequestration in agricultural soils via cultivation of cover crops – A meta-analysis. <i>Agric. Ecosyst. Environ.</i> 200, 33–41. <a href="https://doi.org/10.1016/j.agee.2014.10.024">https://doi.org/10.1016/j.agee.2014.10.024</a>                                                                                                                                                                                                                                                                                                              |
| Grasslands                                                           | Poepplau, C., Zopf, D., Greiner, B., Geerts, R., Korvaar, H., Thumm, U., Don, A., Heidkamp, A., Flessa, H., 2018. Why does mineral fertilisation increase soil carbon stocks in temperate grasslands? <i>Agriculture, Ecosystems &amp; Environment</i> 265, 144–155.                                                                                                                                                                                                                                                                                                                   |
| Annual and perennial croplands                                       | Powelson, D.S., Riche, A.B., Coleman, K., Glendinning, M.J., Whitmore, A.P., 2008. Carbon sequestration in European soils through straw incorporation: Limitations and alternatives. <i>Waste Management, OECD Workshop - Soils and Waste Management: A Challenge to Climate Change</i> 28, 741–746.                                                                                                                                                                                                                                                                                   |
| Annual and perennial croplands, Grasslands, Land use change          | Sanz, M.J., De Vente, J., Chotte, J.-L., Bernoux, M., Kust, G.S., Ruiz, I., Almagro, M., Alloza, J.-A., Vallejo, R., Castillo, V., 2017. Sustainable Land Management contribution to successful land-based climate change adaptation and mitigation. A Report of the Science-Policy Interface. United Nations Convention to Combat Desertification United Nations                                                                                                                                                                                                                      |
| Annual and perennial croplands, Grasslands                           | Shi, L., Feng, W., Xu, J., Kuzakov, Y., 2018. Agroforestry systems: Meta-analysis of soil carbon stocks, sequestration processes, and future potentials. <i>Land Degrad. Dev.</i> 29, 3886–3897. <a href="https://doi.org/10.1002/ldr.3136">https://doi.org/10.1002/ldr.3136</a>                                                                                                                                                                                                                                                                                                       |
| Forests, Annual and perennial croplands, Grasslands, Land use change | Smith, P., Calvin, K., Nkem, J., Campbell, D., Cherubini, F., Grassi, G., Korotkov, V., Hoang, A.L., Lwasa, S., McElwee, P., Nkonya, E., Saigusa, N., Soussana, J.-F., Taboada, M.A., Manning, F.C., Nampanzira, D., Arias-Navarro, C., Vizzari, M., House, J., Roe, S., Cowie, A., Rounsevell, M., Arneeth, A., 2020. Which practices co-deliver food security, climate change mitigation and adaptation, and combat land degradation and desertification? <i>Glob. Change Biol.</i> 26, 1532–1575. <a href="https://doi.org/10.1111/gcb.14878">https://doi.org/10.1111/gcb.14878</a> |
| Annual and perennial croplands                                       | Smith, P., Martino, D., Cai, Z., Gwary, D., Janzen, H., Kumar, P., McGill, B., Ogle, S., O'Mara, F., Rice, C., Scholes, B., Sirotenko, O., Howden, M., McAllister, T., Pan, G., Romanenko, V., Schneider, U., Towprayoon, S., Wattenbach, M., Smith, J., 2008. Greenhouse gas mitigation in agriculture. <i>Philos. Trans. R. Soc. B Biol. Sci.</i> 363, 789–813. <a href="https://doi.org/10.1098/rstb.2007.2184">https://doi.org/10.1098/rstb.2007.2184</a>                                                                                                                          |
| Annual and perennial croplands, Grasslands                           | Vanlauwe, B., Batiano, A., Chianu, J., Giller, K.E., Merckx, R., Mkwanyu, U., Ohiokpehai, O., Pypers, P., Tabo, R., Shepherd, K.D., Smaling, E.M.A., Woomer, P.L., Sanginga, N., 2010. Integrated Soil Fertility Management: Operational Definition and Consequences for Implementation and Dissemination. <i>Outlook Agric</i> 39, 17–24.                                                                                                                                                                                                                                             |
